# Supplementary material
Source: ML conference proceedings conference paper supplement (https://openaccess.thecvf.com/content/ICCV2025/html/Jiang_Causal_Disentanglement_and_ICCV_2025_paper.html)
Supplement: Supplementary file 1 [file Jiang_Causal_Disentanglement_and_ICCV_2025_supplemental.pdf]

# Causal Disentanglement and Cross-Modal Alignment for Enhanced Few-Shot Learning

## Supplementary Material

Tianjiao Jiang, Zhen Zhang, Yuhang Liu\*, Javen Qinfeng Shi  
 Australian Institute for Machine Learning, The University of Adelaide, Australia  
 {tianjiao.jiang, zhen.zhang02, yuhang.liu01, javen.shi}@adelaide.edu.au

### 6. Comparison with Other Methods

To allow a more comprehensive comparison with recent methods, we evaluated the performance of AMU-Tuning [3] and Transductive-CLIP [2] alongside our own approach. As shown in Tab. 6, our method consistently outperforms AMU-Tuning. Compared to Transductive-CLIP, our method achieves better performance in the 1-shot and 2-shot settings, but falls short in the 4-, 8-, and 16-shot settings.

It is important to note that Transductive-CLIP is highly sensitive to the number of classes in the query batch (denoted as  $k_{eff}$ ); its performance can drop significantly with even a slight increase in  $k_{eff}$ . Moreover, as discussed in Related Work, AMU-Tuning incorporates an additional pre-trained model, MoCo v3 [1], alongside CLIP, rendering direct comparisons somewhat unfair. Similarly, Transductive-CLIP operates under a *transductive setting*, where predictions are made jointly for a batch of samples, leveraging inter-sample dependencies. In contrast, our method uses a more general *inductive setting*, performing inference independently for each sample. This difference in inference paradigm makes direct comparison inherently inequitable.

Table 6. Average few-shot classification accuracy (%) across 11 datasets for different methods.

| Method                              | 1-shot | 2-shot | 4-shot | 8-shot | 16-shot |
|-------------------------------------|--------|--------|--------|--------|---------|
| AMU-Tuning                          | 64.50  | 66.95  | 70.57  | 72.87  | 74.71   |
| Transductive-CLIP ( $k_{eff} = 5$ ) | 65.25  | 68.58  | 73.77  | 77.98  | 81.25   |
| Transductive-CLIP ( $k_{eff} = 7$ ) | 61.60  | 64.08  | 68.99  | 73.58  | 76.97   |
| CCA-FT (Ours)                       | 66.00  | 68.62  | 72.10  | 74.84  | 77.60   |

### 7. Ablation Study: Different ICA Dimensions

To assess the robustness of CCA-FT with respect to varying ICA dimensions  $M$ , we perform few-shot experiments for  $M \in \{128, 256, 512, 1024\}$  and compare the results

with Tip-Adapter-F. As illustrated in Fig. 6, CCA-FT consistently surpasses Tip-Adapter-F, even when the ICA dimension is as low as 128.

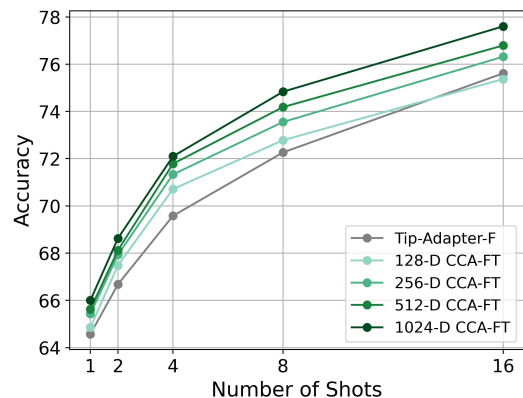

Figure 6. Average classification accuracy (%) of CCA-FT with varying feature dimensions  $M$  across 11 datasets, compared with Tip-Adapter-F.

### References

- [1] Xinlei Chen, Saining Xie, and Kaiming He. An empirical study of training self-supervised vision transformers. In *Proceedings of the IEEE/CVF international conference on computer vision*, pages 9640–9649, 2021.
- [2] Ségolène Martin, Yunshi Huang, Fereshteh Shakeri, Jean-Christophe Pesquet, and Ismail Ben Ayed. Transductive zero-shot and few-shot clip. In *Proceedings of the IEEE/CVF Conference on Computer Vision and Pattern Recognition*, pages 28816–28826, 2024.
- [3] Yuwei Tang, Zhenyi Lin, Qilong Wang, Pengfei Zhu, and Qinghua Hu. Amu-tuning: Effective logit bias for clip-based few-shot learning. In *Proceedings of the IEEE/CVF Conference on Computer Vision and Pattern Recognition*, pages 23323–23333, 2024.

\*Corresponding author. Email: yuhang.liu01@adelaide.edu.au
